# Supplementary material for: Green synthesis of Pt-doped TiO2nanocrystals with exposed (001) facets and mesoscopic void space for photo-splitting of water under solar irradiation
Source: Royal Society of Chemistry journal article supplement (doi:10.1039/c5nr02097b), 2015-01-01
Supplement: c5nr02097b1.pdf [file c5nr02097b1.pdf]

## Supplementary Materials

Green synthesis of Pt-doped TiO<sub>2</sub> nanocrystals with exposed (001) facets and mesoscopic void space for photo-splitting of water under solar irradiation

Biplab Banerjee,<sup>a</sup> Vipin Amoli,<sup>b</sup> Abhayankar Maurya,<sup>b</sup> Anil Kumar Sinha<sup>b</sup> and Asim Bhaumik<sup>a\*</sup>

<sup>a</sup>*Department of Material Science, Indian Association for the Cultivation of Science, Kolkata-700032, India*

<sup>b</sup>*CSIR-Indian Institute of Petroleum, Dehradun 248005, India.*

---

**Figure S1.** Emission Spectrum of solar simulator (Newport 94023A Oriel Sol3A) used for photocatalytic activity test of the Pt/TiO<sub>2</sub> materials

|                      | <b>400-500</b> | <b>500-600</b> | <b>600-700</b> | <b>700-800</b> | <b>800-900</b> | <b>900-1100</b> | <b>400-1100</b> |
|----------------------|----------------|----------------|----------------|----------------|----------------|-----------------|-----------------|
| <b>Ideal Match %</b> | <b>18.40 %</b> | <b>19.90 %</b> | <b>18.40 %</b> | <b>14.90 %</b> | <b>12.50 %</b> | <b>15.90 %</b>  | <b>100.00 %</b> |
| <b>Upper Limit %</b> | <b>23.00 %</b> | <b>24.88 %</b> | <b>23.00 %</b> | <b>18.63 %</b> | <b>15.63 %</b> | <b>19.88 %</b>  |                 |
| <b>Lower Limit %</b> | <b>13.80 %</b> | <b>14.93 %</b> | <b>13.80 %</b> | <b>11.18 %</b> | <b>9.38 %</b>  | <b>11.93 %</b>  |                 |
| <b>Sol 3A %</b>      | <b>22.50 %</b> | <b>22.78 %</b> | <b>19.68 %</b> | <b>11.30 %</b> | <b>10.57 %</b> | <b>16.00 %</b>  |                 |

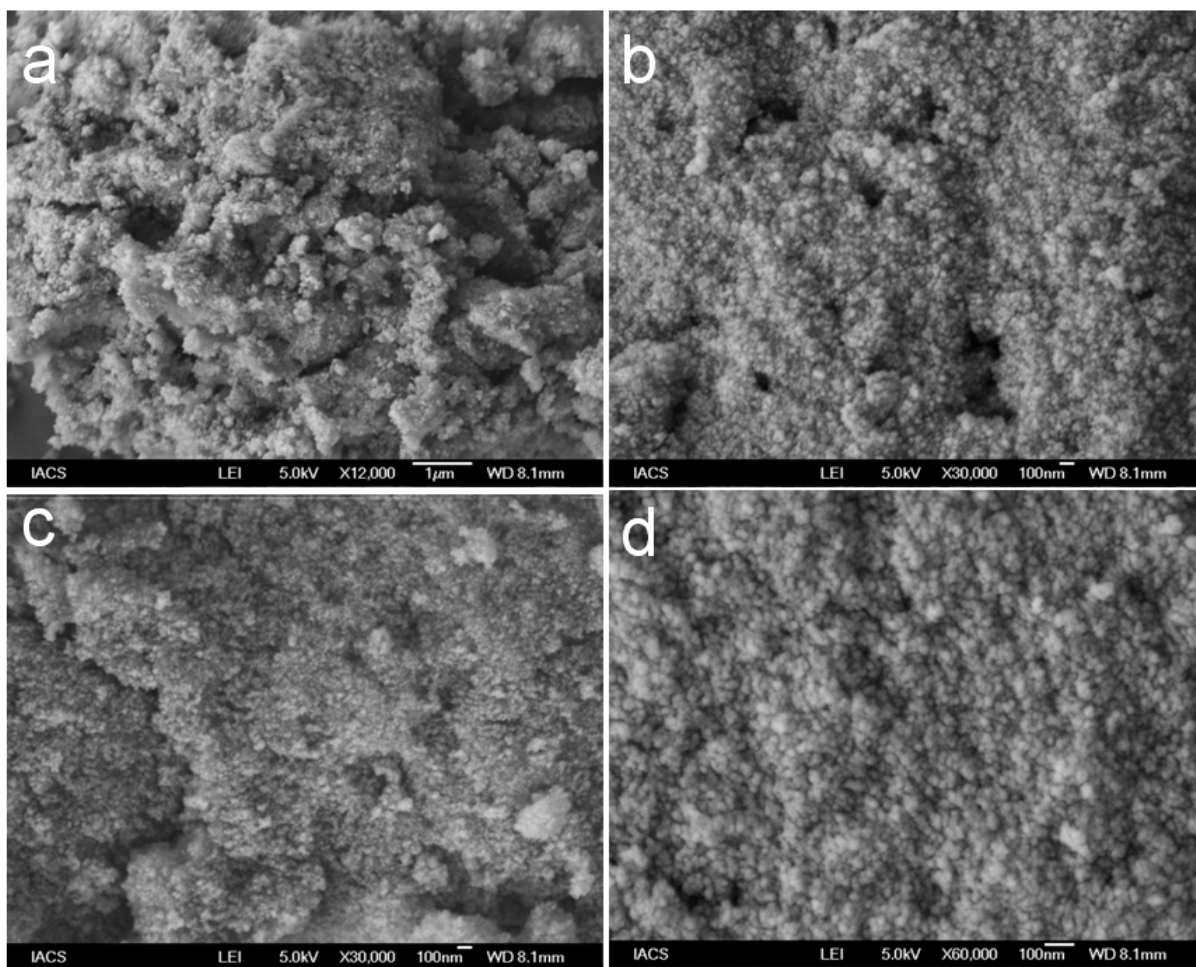

**Fig. S2.** FE-SEM images of IL-MTO-1C (a), IL-MTO-1C-06 (b) IL-MTO-1C-13 (c), IL-MTO-1C-26 (d).

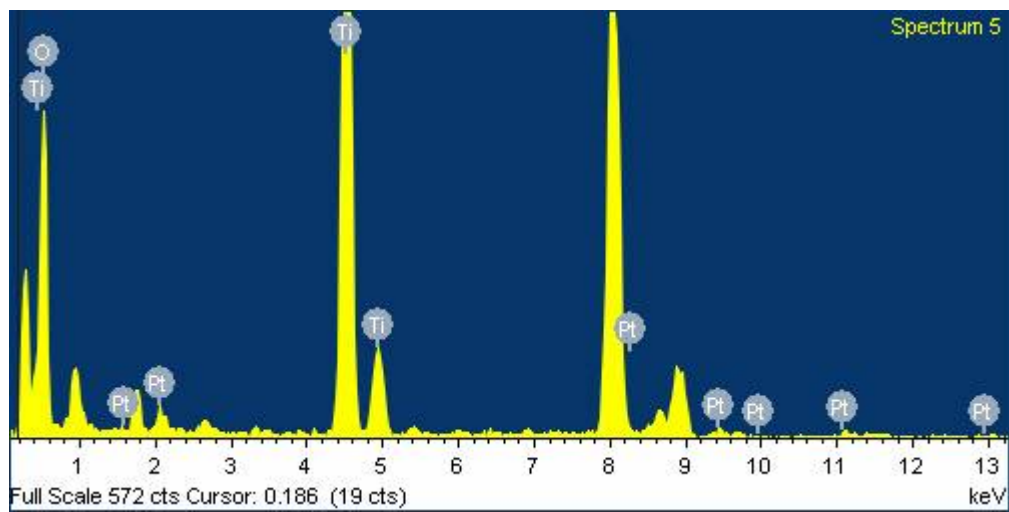

**Fig. S3.** EDS pattern of IL-MTO-1C-26
